# Supplementary material for: NR4A1 Ligands as Potent Inhibitors of Breast Cancer Cell and Tumor Growth
Source: MDPI journal article supplement (doi:10.3390/cancers13112682), 2021-05-29
Supplement: s1 [file s1]

Supplemental Figure 1

MDA-MB-231

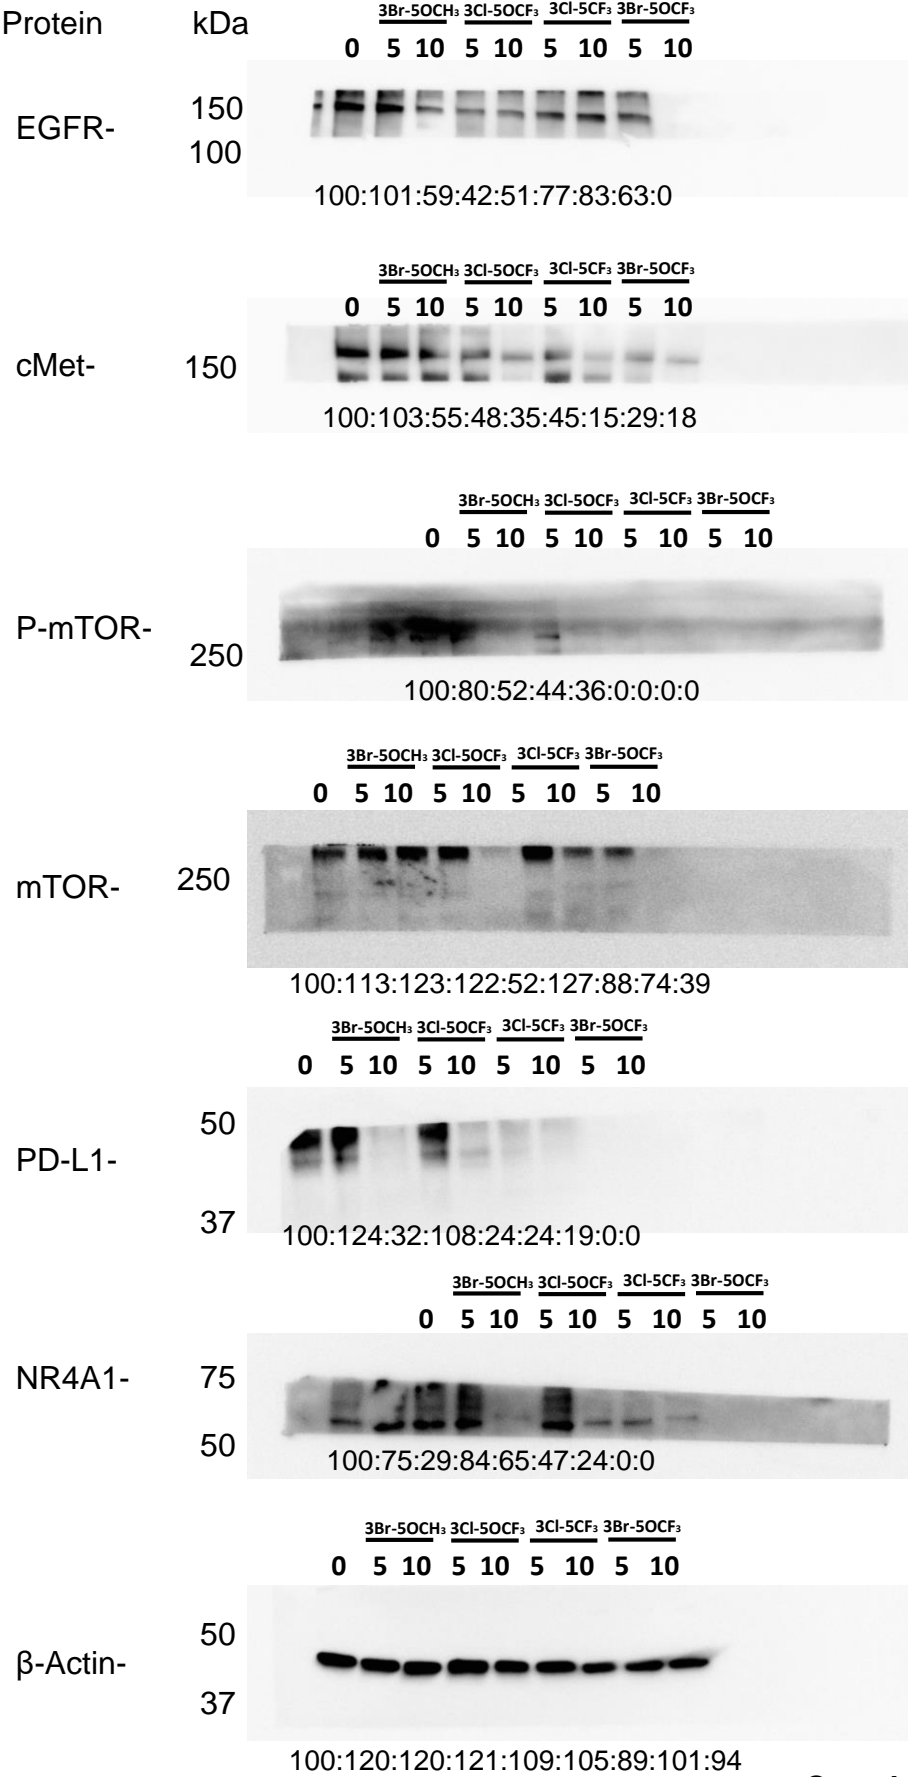

Correlates to Figure 3

Supplemental Figure 2

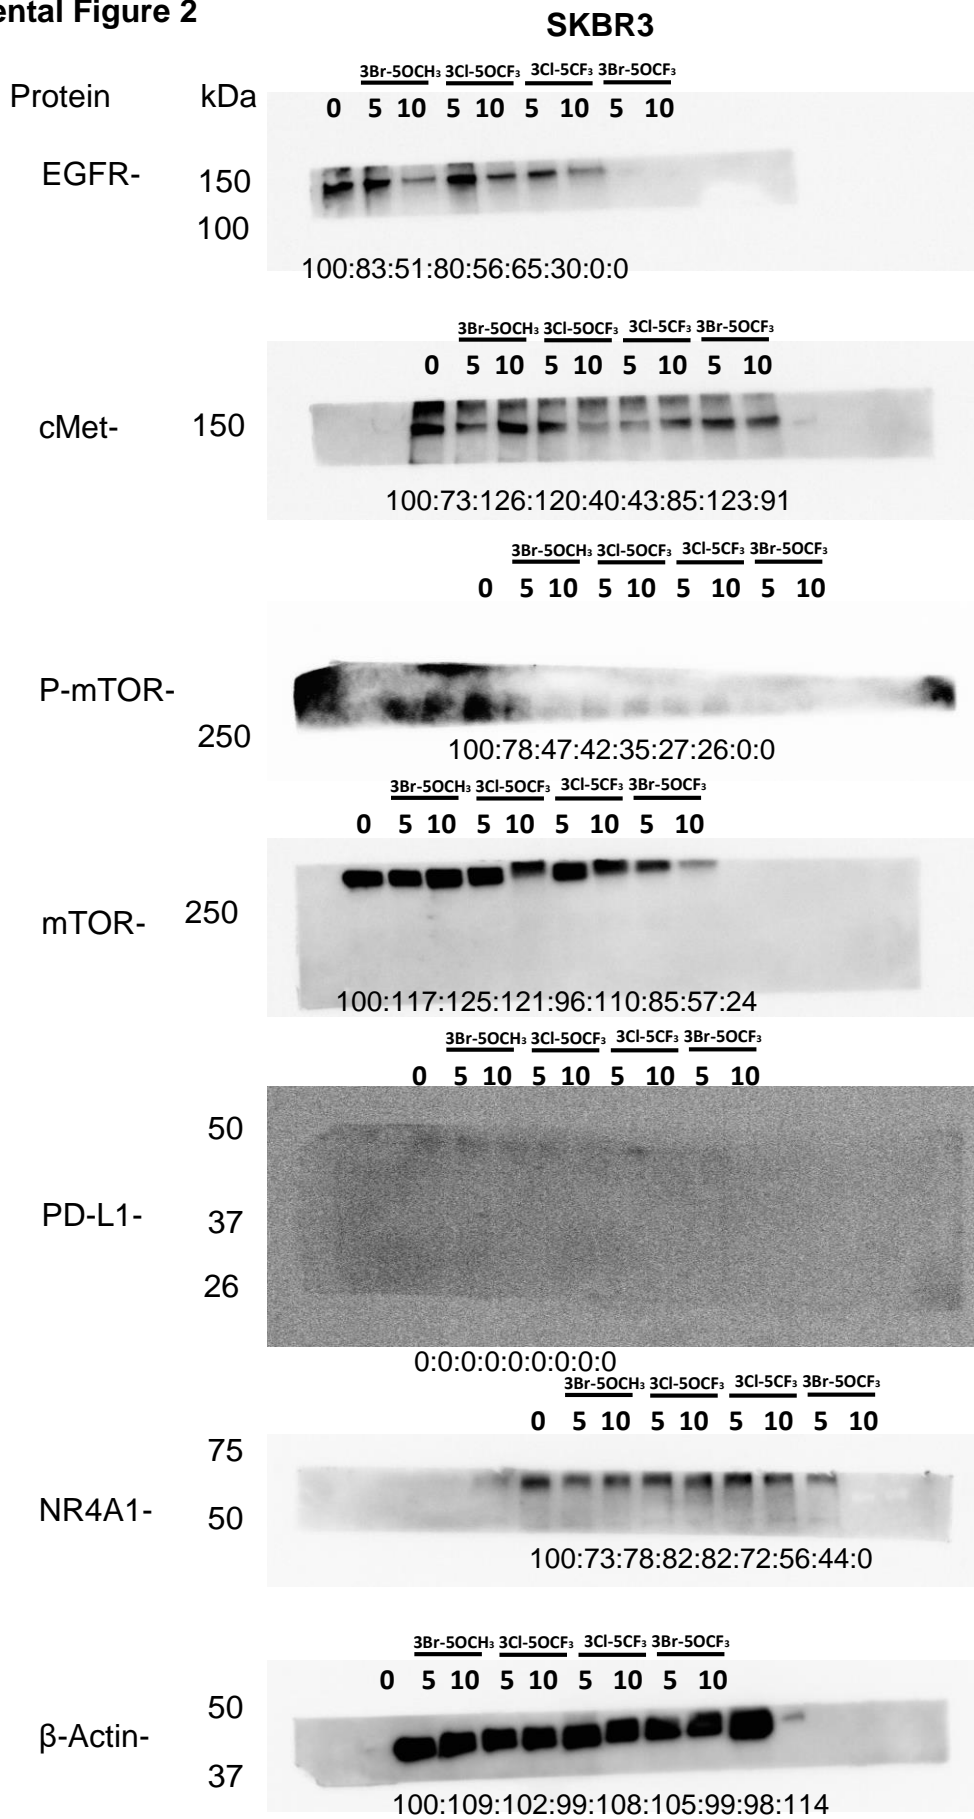

Correlates to Figure 4

Supplemental Figure 3

Animal Study

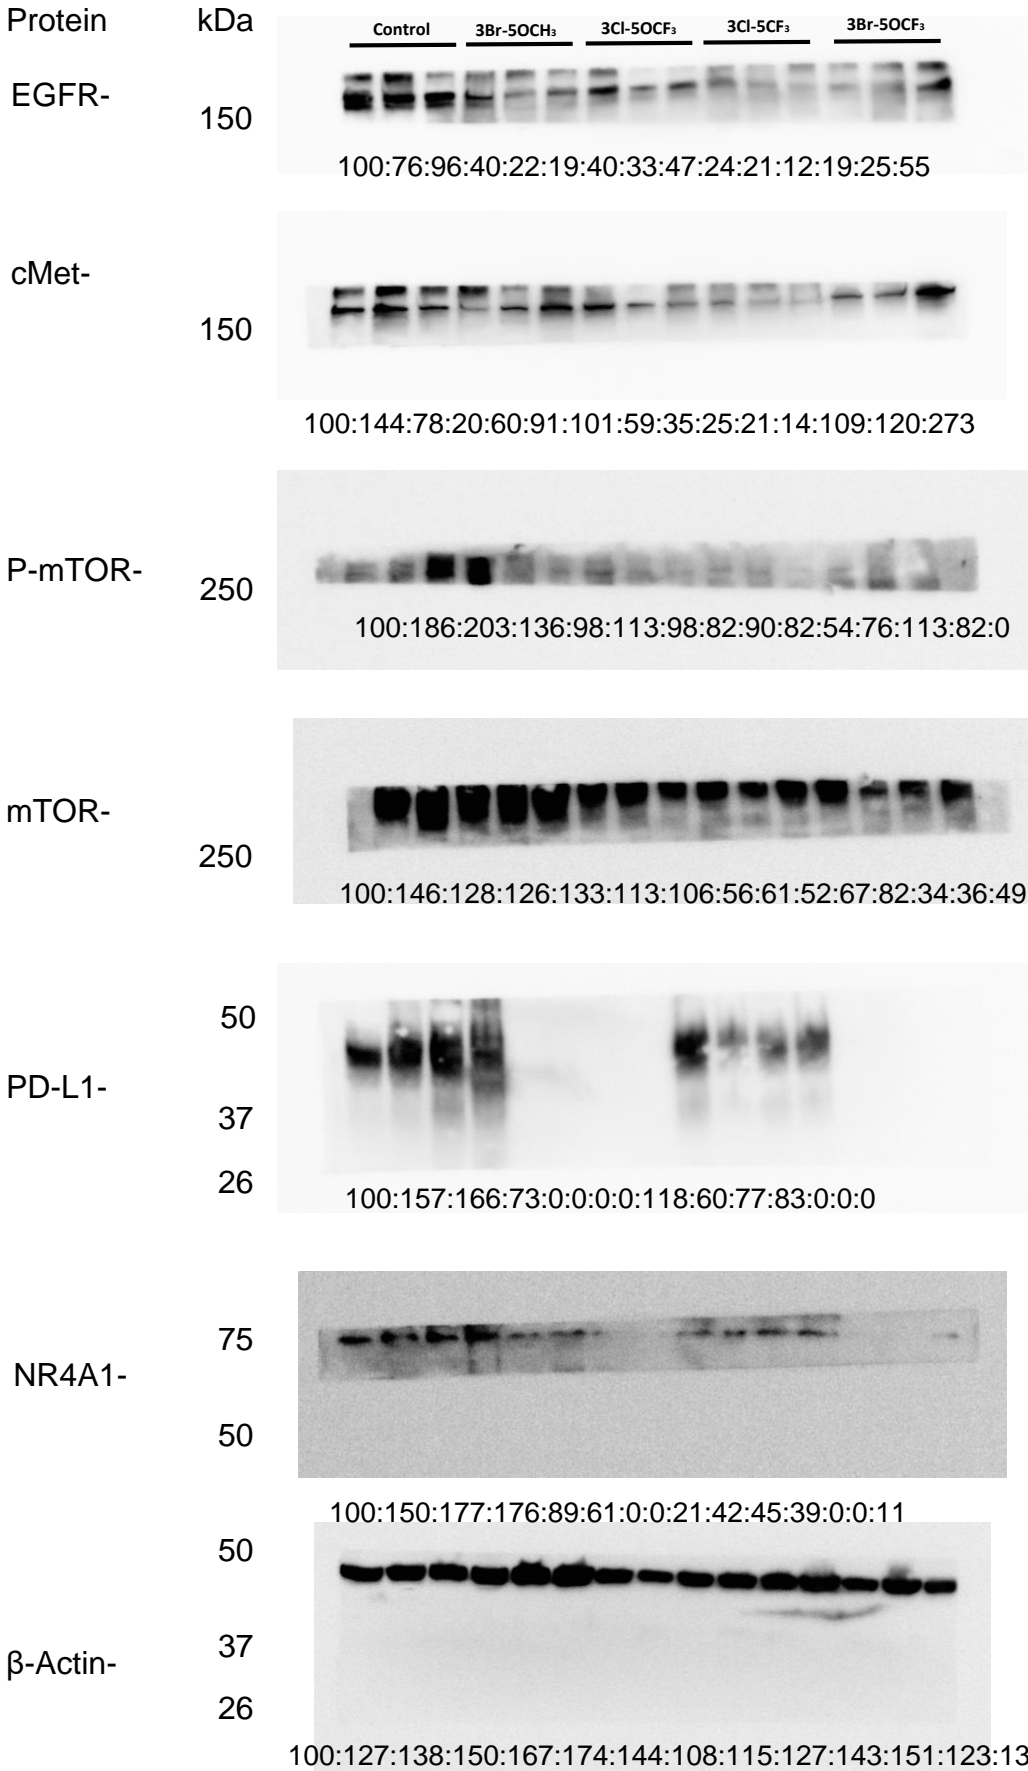

Correlates to Figure 7

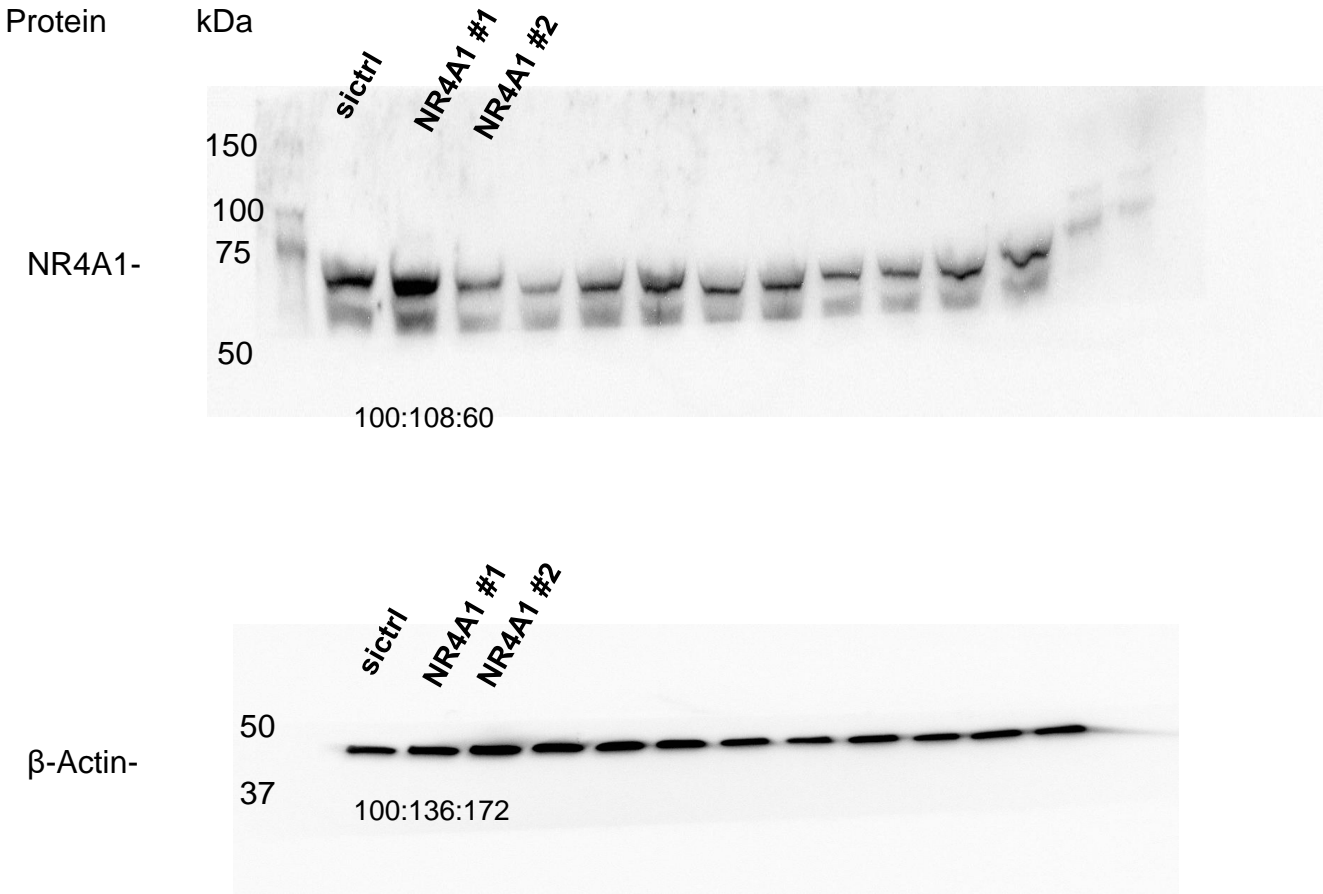

Correlates to Figure 3E

Supplemental Figure 5

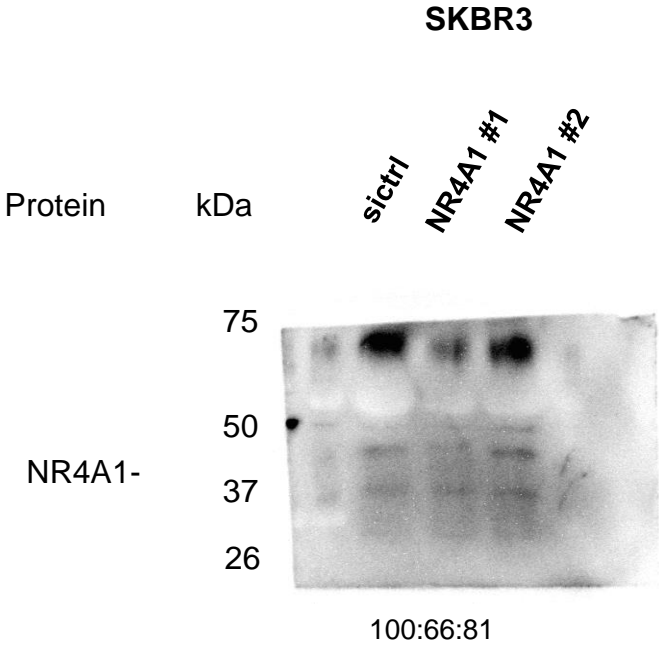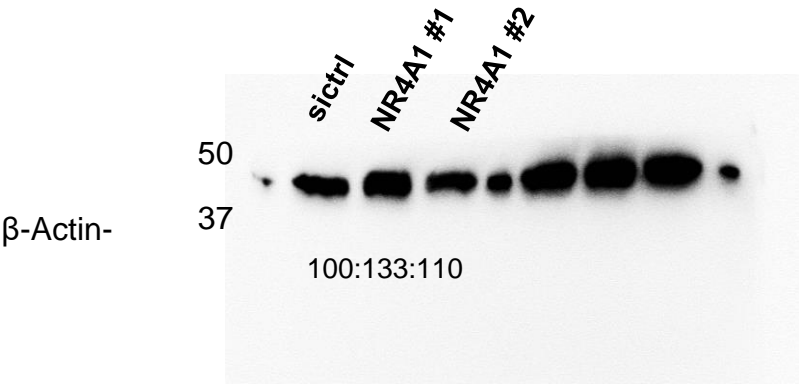

Correlates to Figure 4E
